# Supplementary material
Source: Research Square preprint supplement (doi:10.21203/rs.3.rs-8817433/v1)
Supplement: Supplementary file 1 [file bbabdd7fb73b1be42268fd04.docx]

**Annex : a copy of the collection of edible Orthoptera species**

**Illustrations of locusts(Caelifera) and crickets (Ensifera) consumed**

**1.Edible locusts (Caelifera)**


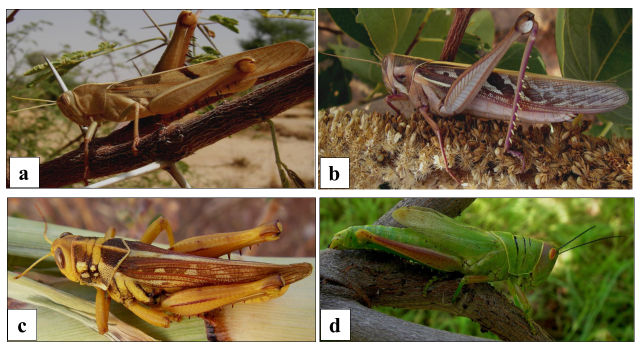


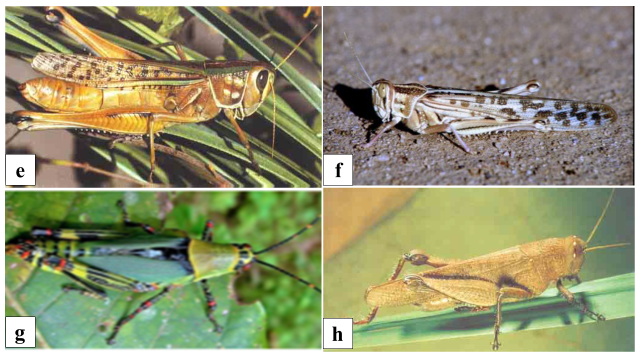


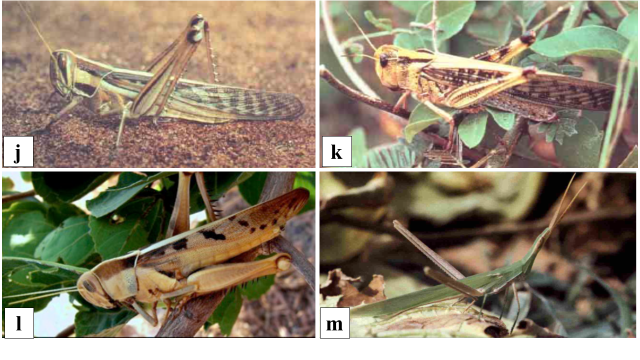


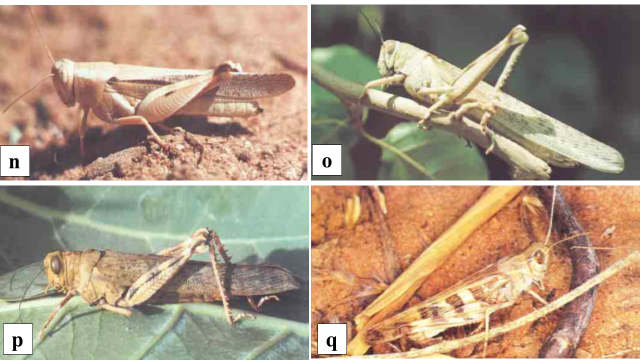


**
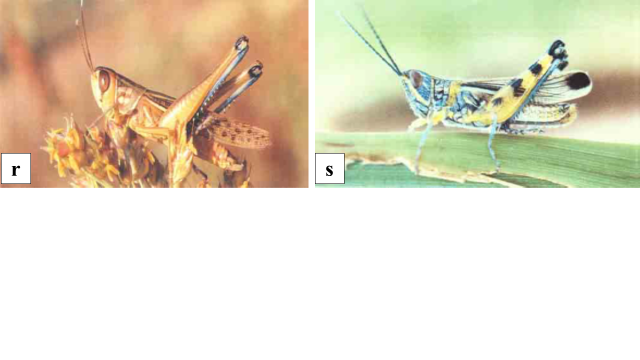
**

**a :** *Acanthacris ruficornis* citrina; **b :** *Ornithacris turbida* cavroisi (Tchibozo and Lecoq 2017) ; **c :** *Kraussaria angulifera* (Tchibozo and Mergen 2016) ; **d :** *Hieroglyphus africanus* (Tchibozo and Lecoq 2017);**e :** *Cataloipus cymbiferus* (Lecoq 1988); **f :** *Schistocerca gregaria* (Lecoq 1988); **g :** *Zonocerus variegatus* (Tchibozo and Lecoq 2017) ; **h :** *Acridoderes strenuus* (Lecoq 1988) ; **j :** *Nomadacris septemfasciata* (Lecoq 1988); **k :** *Locusta migratoria migratorioides* (Lecoq 1988); **l :** *Cyrtacanthacris aeruginosa* (Tchibozo and Lecoq 2017) ; **m :** *Acrida bicolor* (Lecoq 1988); **n :** *Diabolocatantops axillaris* (Lecoq 1988); **o :** *Anacridium melanorhodon* (Lecoq 1988); **p :** *Anacridium wernerellum* (Lecoq 1988); **q :** *Oedaleus senegalensis* (Lecoq 1988); **r :** *Cataloipus fuscocoerulipes* (Lecoq 1988); **s :** *Kraussella amabile*(Lecoq 1988)

**2. Edible Crickets (Ensifera)**

**
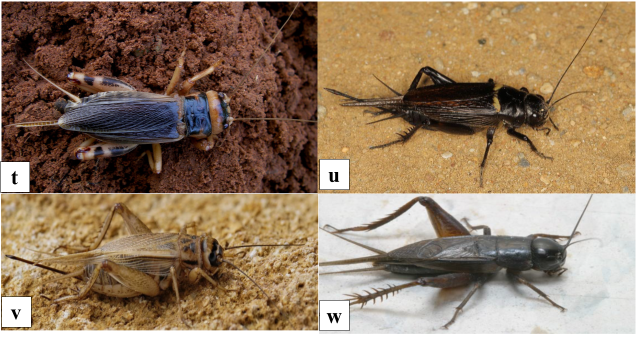
**

**
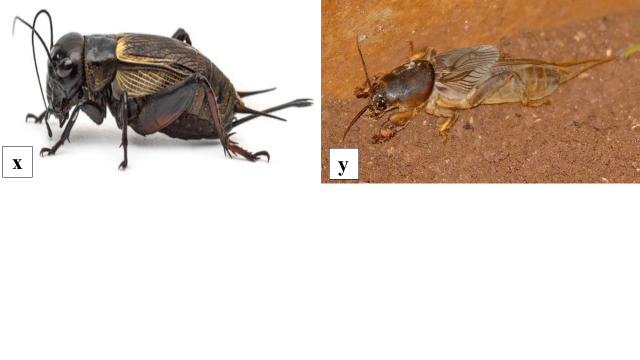
**

**t :** *Brachytrupes membranaceus* (Tchibozo and Mergen 2016);  **u :**  *Gryllus bimaculatus* (Heyns 2024); **v :** *Acheta domesticus* (Ryelandt 2014); **w :**  *Gryllus similis*(Anankware et al. 2016); **x :** *Gryllus campestris*(ARS 2024); **y :**   *Gryllotalpa africana*(ARS 2024)*.*
